# Supplementary material
Source: HighWire-hosted journal article supplement (doi:10.1101/rna.079891.123)
Supplement: Supplemental_Material.docx [file Supplemental_Material.docx]

**SUPPLEMENTARY INFORMATION**

for

**PACRAT: Pathogen detection with aptamer-observed cascaded recombinase polymerase amplification-in vitro transcription**

**Pavana Khan, Lauren M. Aufdembrink, Katarzyna P. Adamala and Aaron E. Engelhart**

**Table of Contents**

**Table S1.** Table showing oligonucleotides used in this work

**Figure S1.** Reactions conducted in varying temperatures with or without SARS-CoV-2 target and monitored for Pepper aptamer fluorescence

**Figure S2.** Reactions with varying concentrations of polyethylene glycol (PEG)

**Figure S3.** Reactions with varying concentrations of inorganic pyrophosphatase

**Figure S4.**  Testing the sensitivity of PACRAT with *E. coli* RNA target

**Figure S5.** Dual detection of wild-type SARS-CoV-2 and Delta variant

**Figure S6.** Testing the sensitivity of PACRAT for direct detection of *E. coli* cells

**Figure S7.** Scheme showing different folds predicted by Geneious bioinformatics software for PACRAT constructs.

**Figure S8.** PACRAT reactions using different fluorescent aptamers (Pepper, Corn, and Broccoli) with the same SARS-CoV-2 B.1.167 target as shown in **Figure S7** folding predictions

| **Name** | **Sequence (5′-3′)** |
| --- | --- |
| **Templates for amplicon transcription** | |
| *aggR* gene with **T7 promoter** | **AAT TCT AAT ACG ACT CAC TAT AGG GAG A**CA GCG ATA CAT TAA GAC GCC TAA AGG ATG CCC TGA TGA TAA TAT ACG GAA TAT CAA AAG TAG ATG CTT GCA GTT GTC CGA ATT GGT CAA AAG GAA TAA TTG TAG CTG ATG CTG ACG |
| *aggR* forward PCR primer | AAT TCT AAT ACG ACT CAC TAT AGG |
| *aggR* reverse PCR primer | CGT CAG CAT CAG CTA CAA TTA |
| SARS-CoV-2 WT Nucleocapsid N3 gene | IDT: CAT_10006625_2019-nCoV_N_Positive Control  nCoV-N control: Severe acute respiratory syndrome coronavirus 2 isolate Wuhan-Hu-  1, complete genome (GenBank: NC_045512.2) |
| SARS-CoV-2 WT forward PCR primer with **T7 promoter** | **AAT TCT AAT ACG ACT CAC TAT AGG GAG A**GG GAG CCT TGA ATA CAC CAA AA |
| SARS-CoV-2 WT reverse PCR primer | GAA GTT GTA GCA CGA TTG CAG |
| SARS-CoV-2 B.1.167 Spike gene with **T7 promoter** | **AAT TCT AAT ACG ACT CAC TAT AGG** GAT TTT TGG ACG TTT ATT ACC ACA AAA ACA ACA AAA GTT GGA TGG AAA GTG GCG TTT AT |
| SARS-CoV-2 B.1.167 forward PCR primer | AAT TCT AAT ACG ACT CAC TAT AGG GAT TTT TGG ACG TT |
| SARS-CoV-2 B.1.167 reverse PCR primer | ATA AAC GCC ACT TTC CAT CCA ACT |
| **PACRAT** **primers** | |
| *aggR* **T7** primer | **AAT TCT AAT ACG ACT CAC TAT AGG GAG A**CG TCA GCA TCA GCT ACA ATT ATT CC |
| *aggR* **Broccoli** primer | **GAG CCC ACA CTC TAC TCG ACA GAT ACG AAT ATC TGG ACC CGA CCG TCT C**CA GCG ATA CAT TAA GAC GCC TAA AG |
| SARS-CoV-2 Spike WT **T7** primer | **AAT TCT AAT ACG ACT CAC TAT AGG GAG A**TG TAG CAC GAT TGC AGC ATT G |
| SARS-CoV-2 Spike WT **Broccoli** primer | **GAG CCC ACA CTC TAC TCG ACA GAT ACG AAT ATC TGG ACC CGA CCG TCT C**GG GAG CCT TGAA TAC ACC AAAA |
| SARS-CoV-2 Spike B.1.167 **T7** primer | **AAT TCT AAT ACG ACT CAC TAT AGG GAT** TTT TGG ACG TTT |
| SARS-CoV-2 Spike B.1.167 **Pepper** primer | **CGG CGC CAG TGC CTG CCG AAG CAG GCC GAC ACG CCA CGA TTG G**AT AAA CGC CAC TT |
| E. coli 16s rRNA T7 primer | **GCT GAA AGT ACT TTA CAA CCC GAA GGC CAG AGG GAT** **A**TC ACT CAG CAT AAT CTT AA |
| E. coli 16s rRNA **Pepper** primer | **TCC CGG CGC CAG TGC CTG CCG AAG CAG GCC GAC ACG CCA CGA TTG G**AG CCC GGG GAT TTC ACA TCT GAC TT |

**Table S1.** Table showing oligonucleotides used in this work


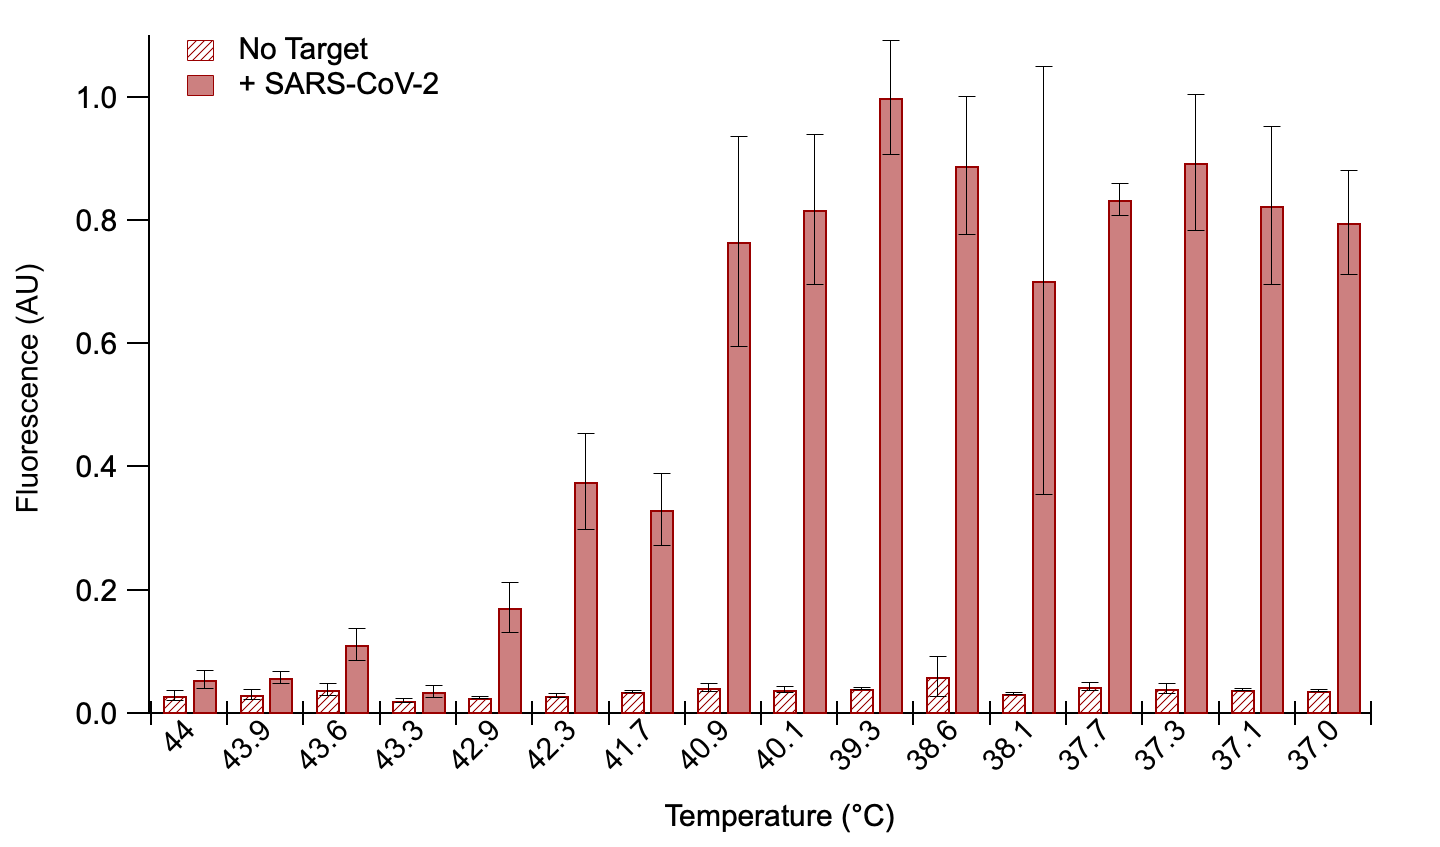


**Figure S1.** Reactions conducted in varying temperatures with or without SARS-CoV-2 target and monitored for Pepper aptamer fluorescence. Error bars represent S.E.M. where n = 3.


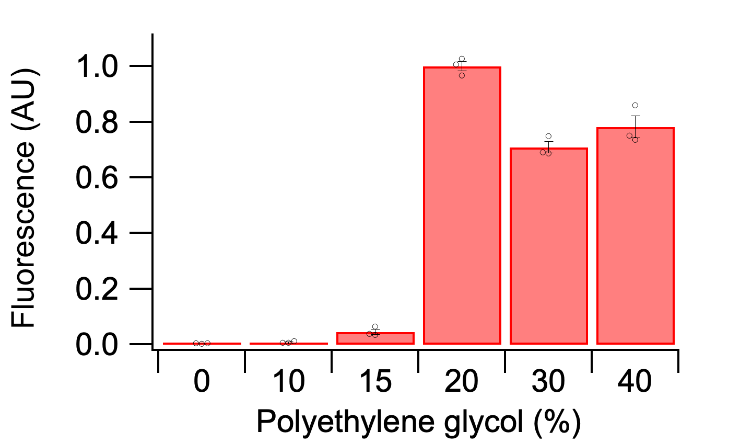


**Figure S2.** Reactions with varying concentrations of polyethylene glycol (PEG). PEG 20,000 was used for these reactions and reactions were carried out with SARS-Cov-2 Spike B.1.167 target and monitored for Pepper aptamer fluorescence. Individual data points for each replicate are shown as black circles. Error bars represent S.E.M. where n = 3.


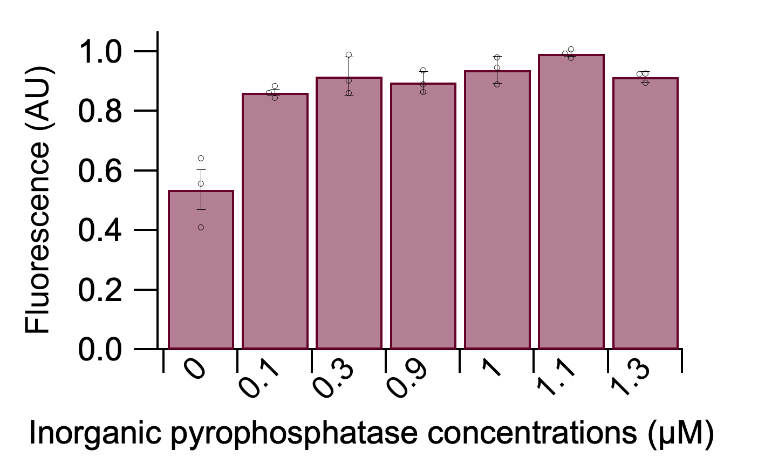


**Figure S3.** Reactions with varying concentrations of inorganic pyrophosphatase. Individual data points for each triplicate are shown as black circles. Error bars represent S.E.M. where n = 3.


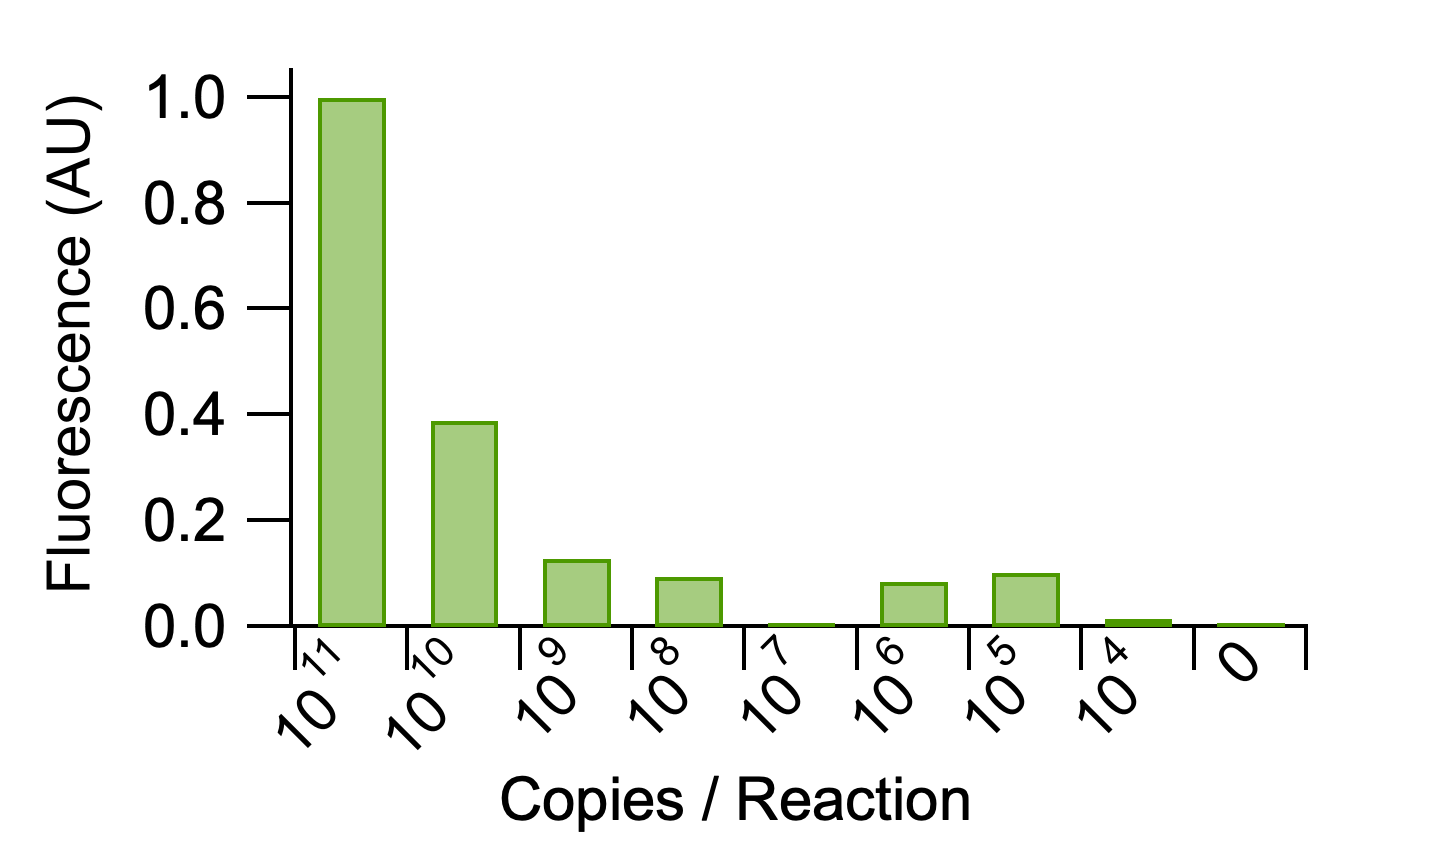


**Figure S4.** Testing the sensitivity of PACRAT with *E. coli* RNA target. Bar plot shows the normalized endpoint Broccoli aptamer fluorescence values for PACRAT reactions with different target copies of the *AggR* gene in *E. coli*.

**a**

**b**


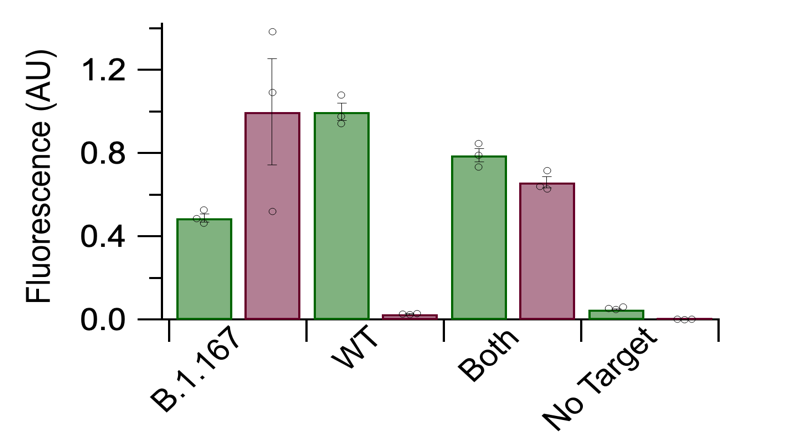

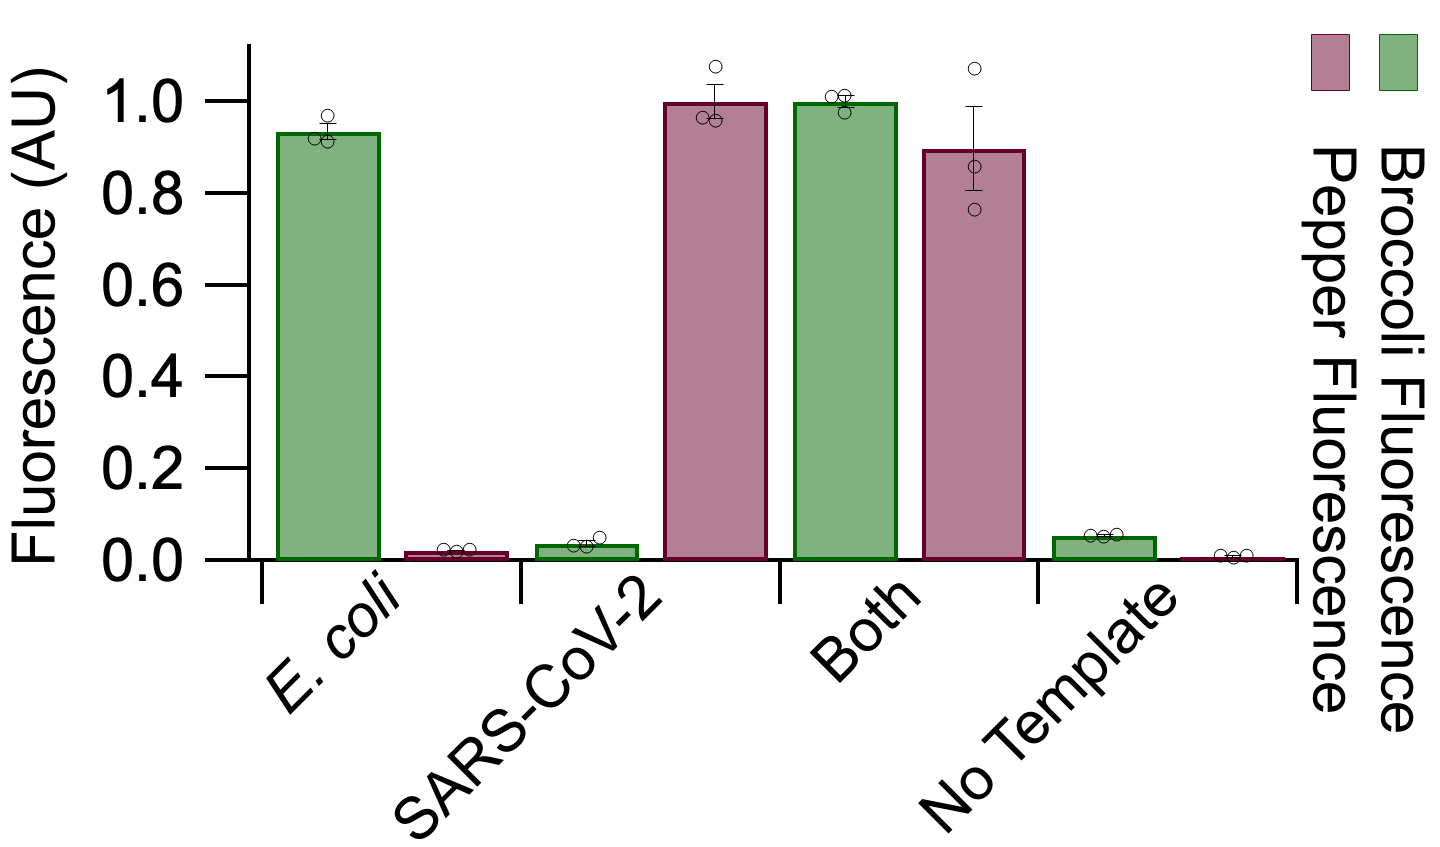

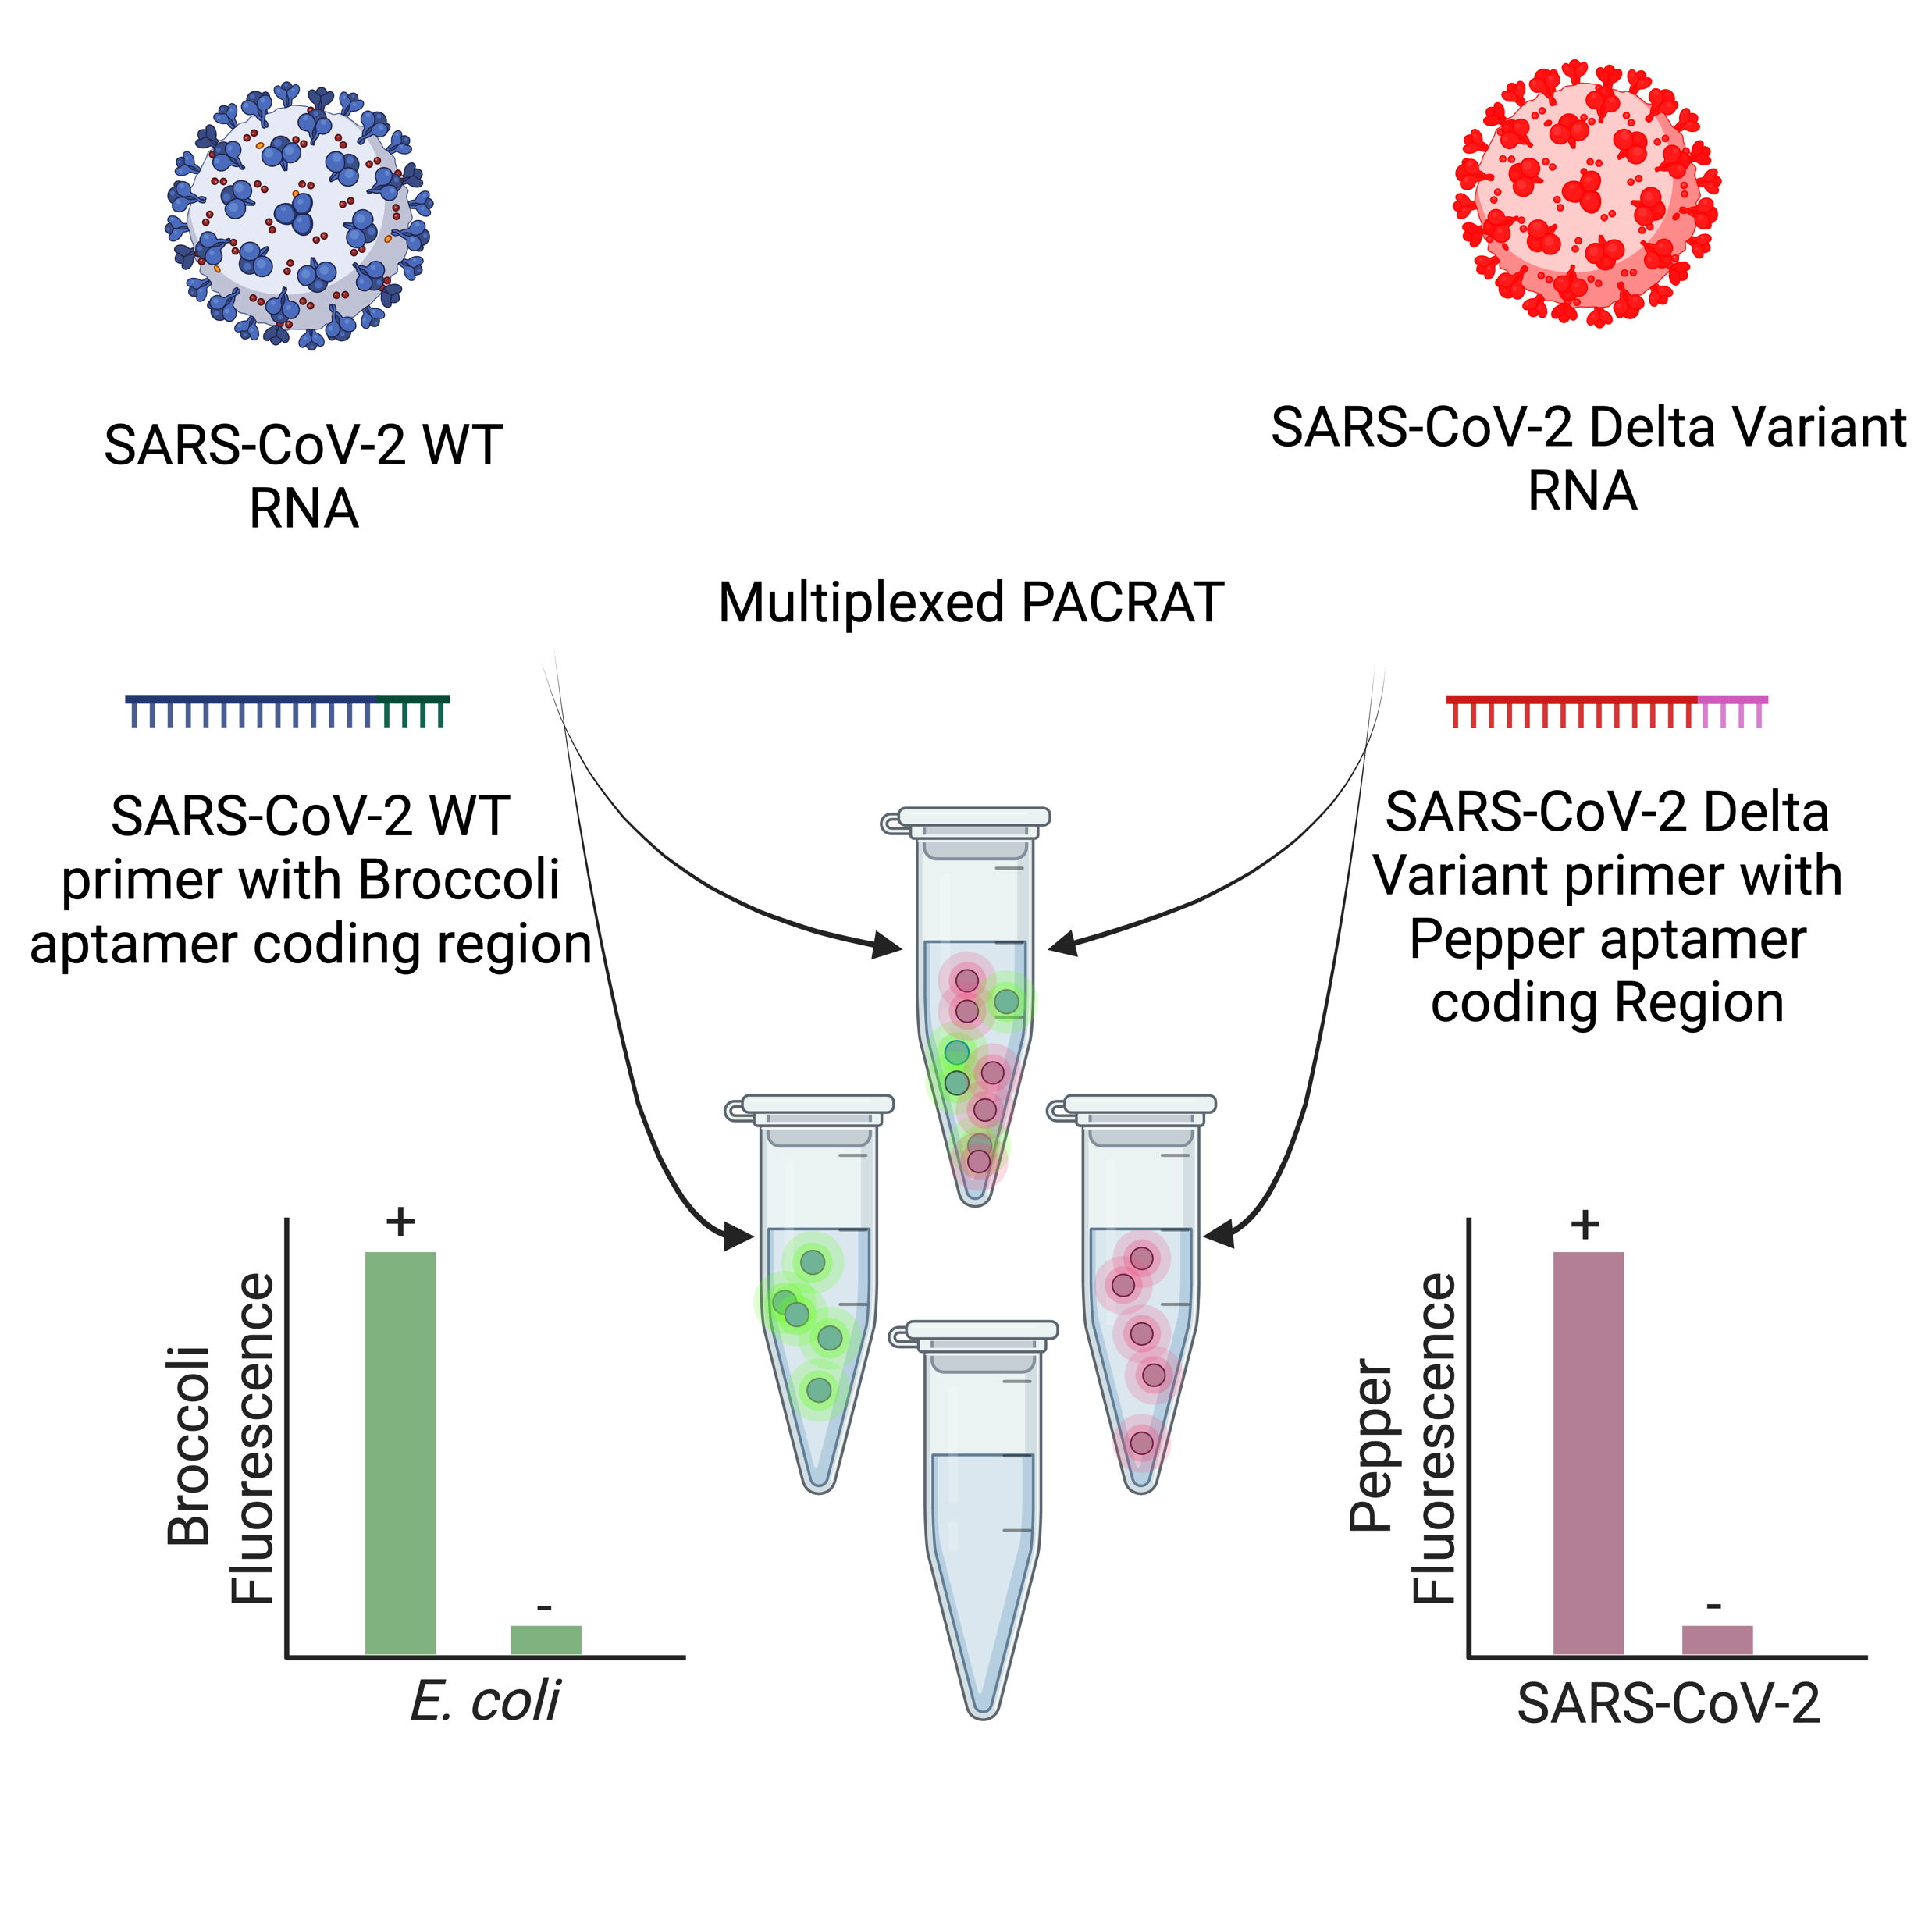


**Figure S5.** Dual detection of wild-type SARS-CoV-2 and Delta variant. a) Schematic of dual detection between wild-type SARS-CoV-2 and Delta variant. b) Normalized fluorescence endpoint values for Broccoli and Pepper aptamers in reactions with SARS-CoV-2 wild-type RNA target (WT) or SARS-CoV-2 Delta variant RNA target (B.1.167), both targets, or neither target. Individual data points for each triplicate are shown as black circles. Error bars represent S.E.M. where n = 3.


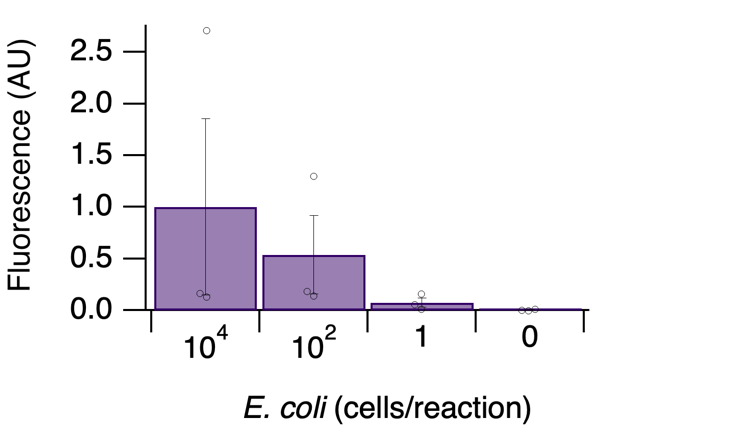

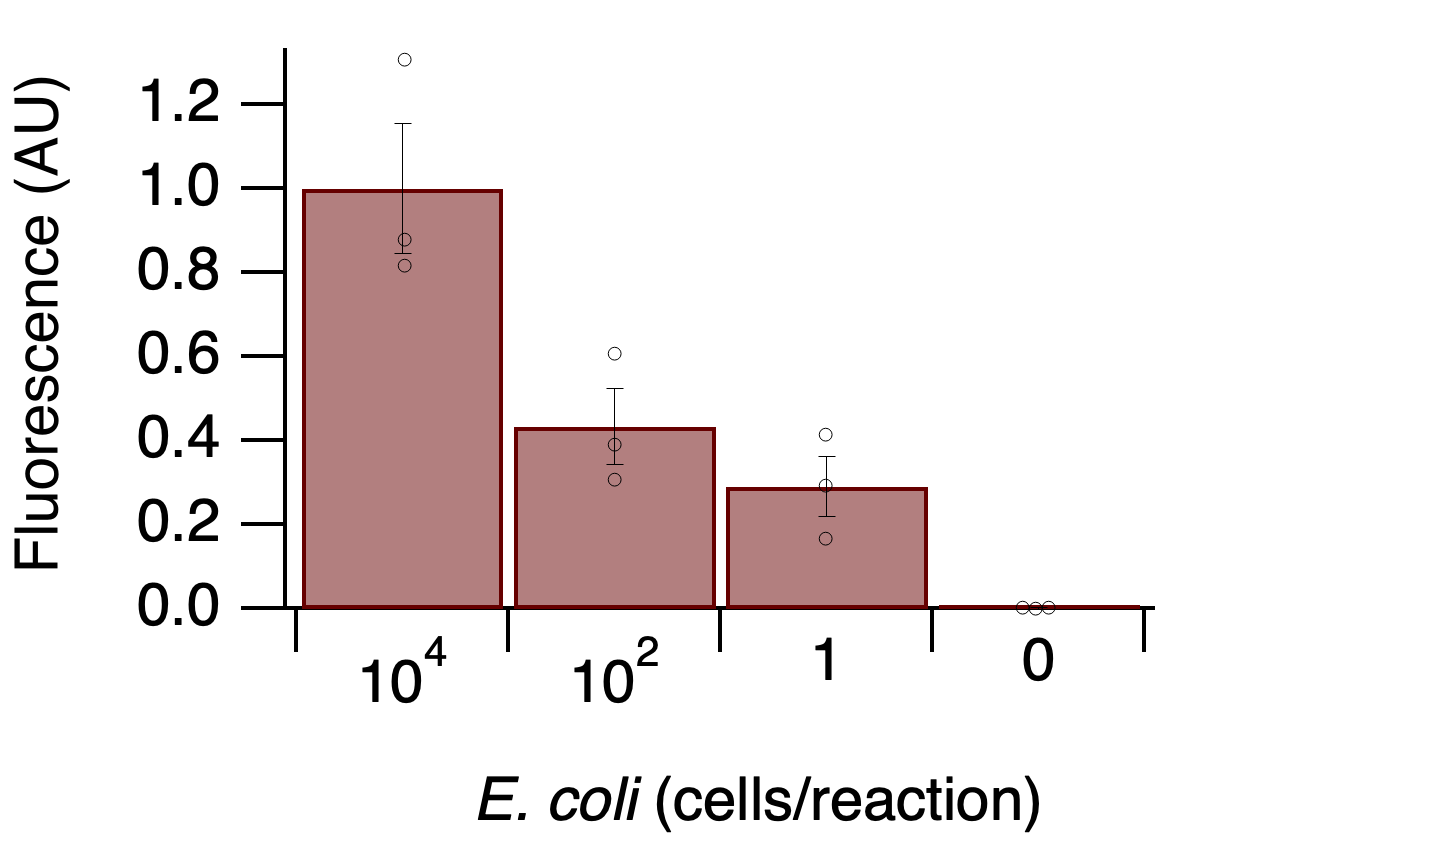


**a**

**b**

**Figure S6.** **Testing the sensitivity of PACRAT for direct detection of *E. coli* cells.** *E. coli* cell lysate was added to PACRAT reactions either after sonication and spin down (a) or without sonication and spin down (b). Individual data points for each triplicate are shown as black circles. Error bars represent S.E.M. where n = 3.

|  | **Pepper** | |
| --- | --- | --- |
| **PACRAT** | Works the best | |
| RNA product | 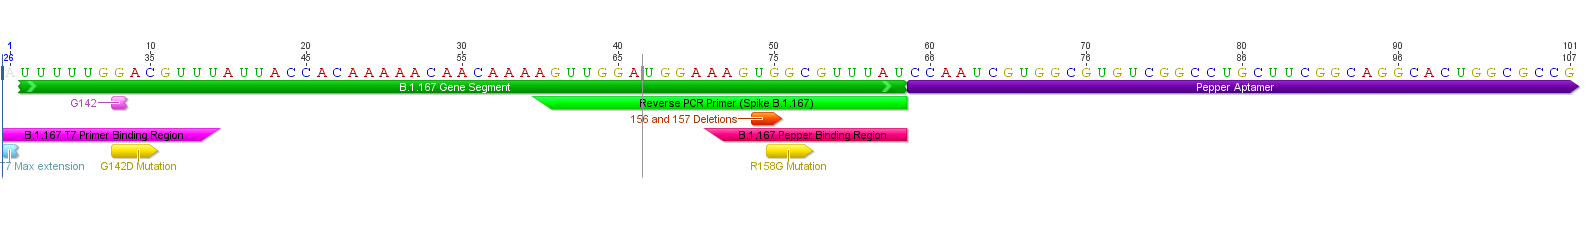   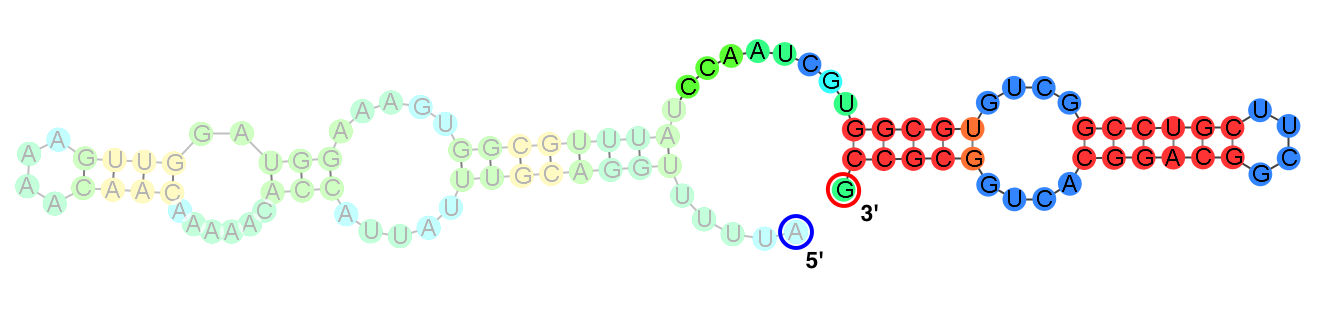 | |
| Interaction between aptamer primer and B.1.167 RNA | 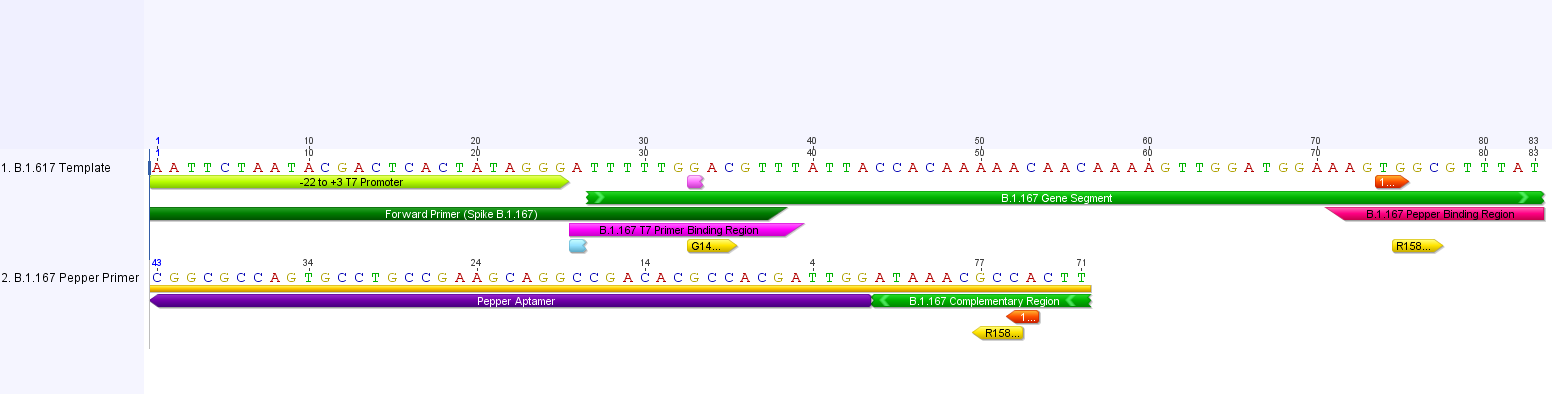  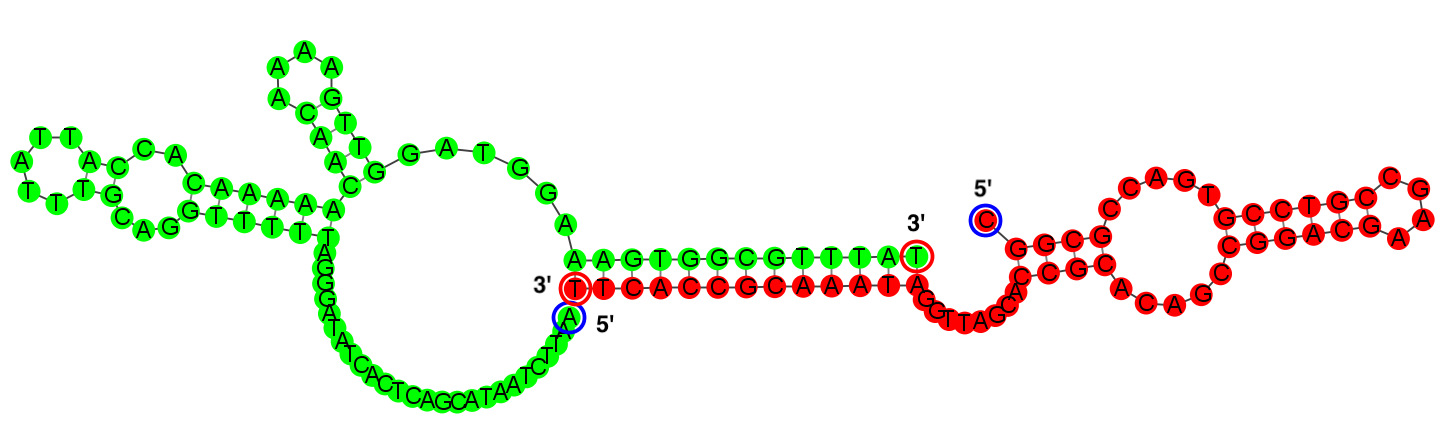 | |
| Interaction between T7 primer and B.1.167 RNA | 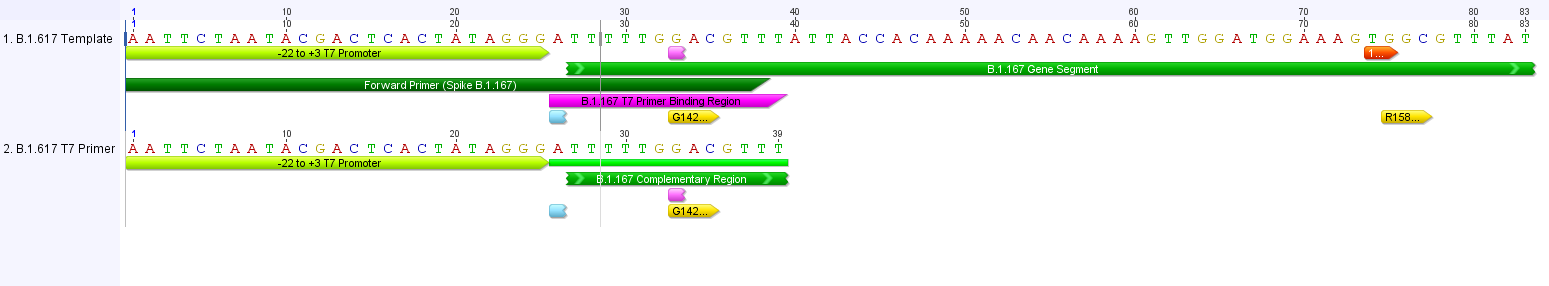  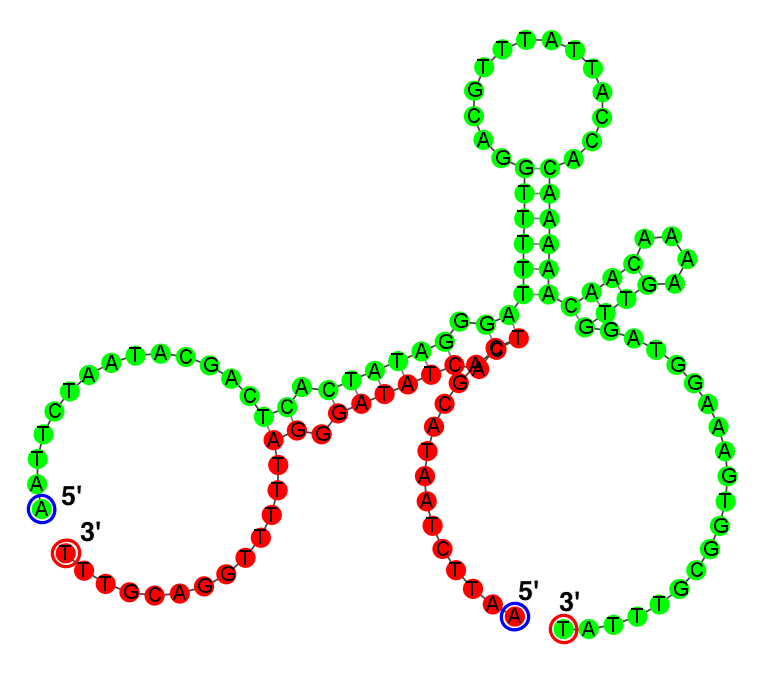 | |
| Interaction between aptamer primer and T7 primer | 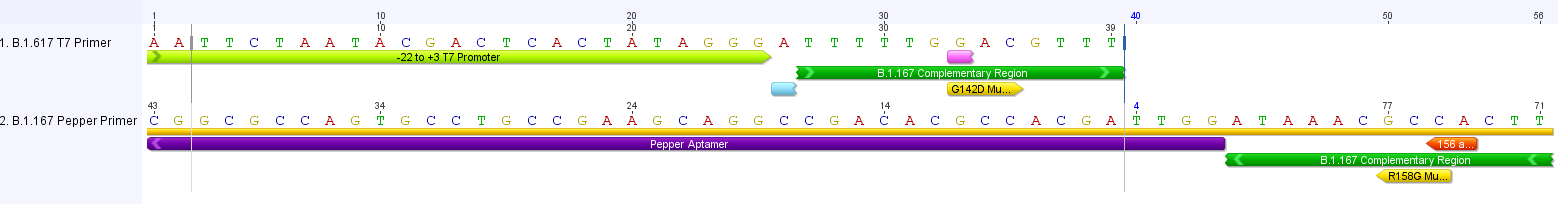  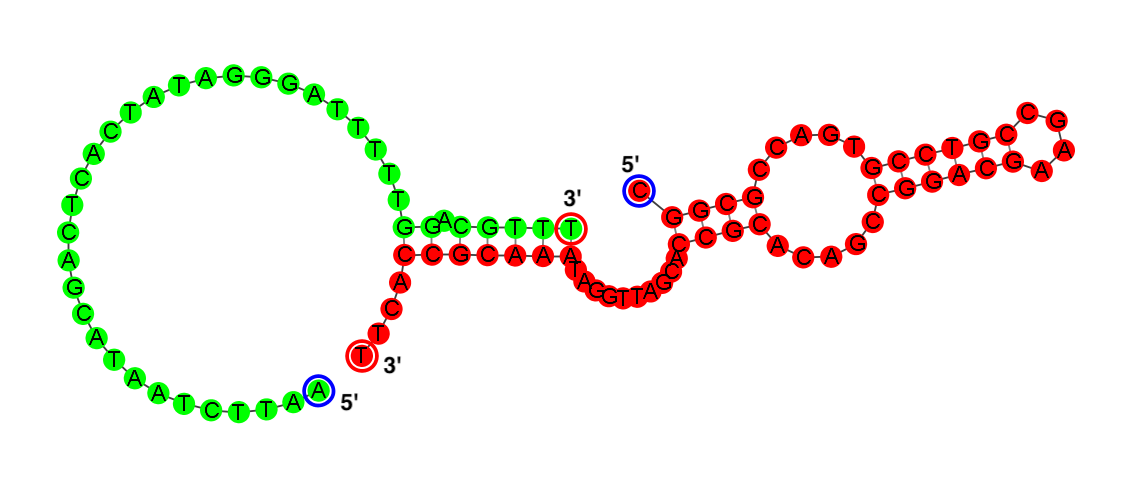 | |
|  |  | |
| Interaction between aptamer primer and RNA product | 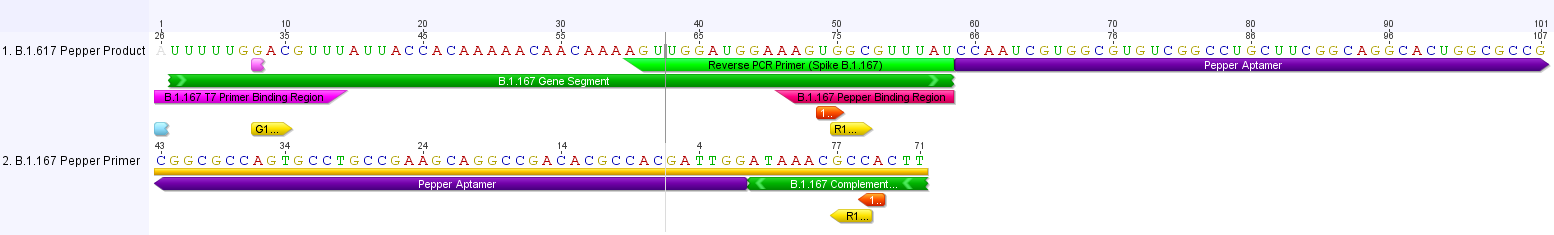  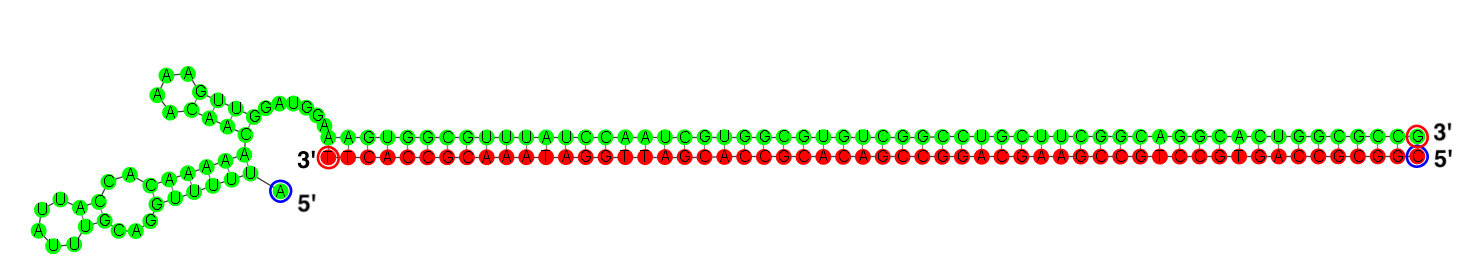 | |
| Interaction between T7 primer and product | 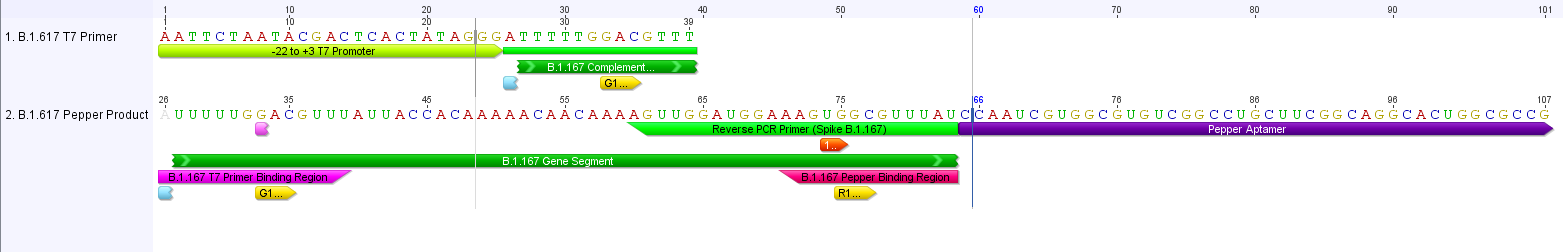  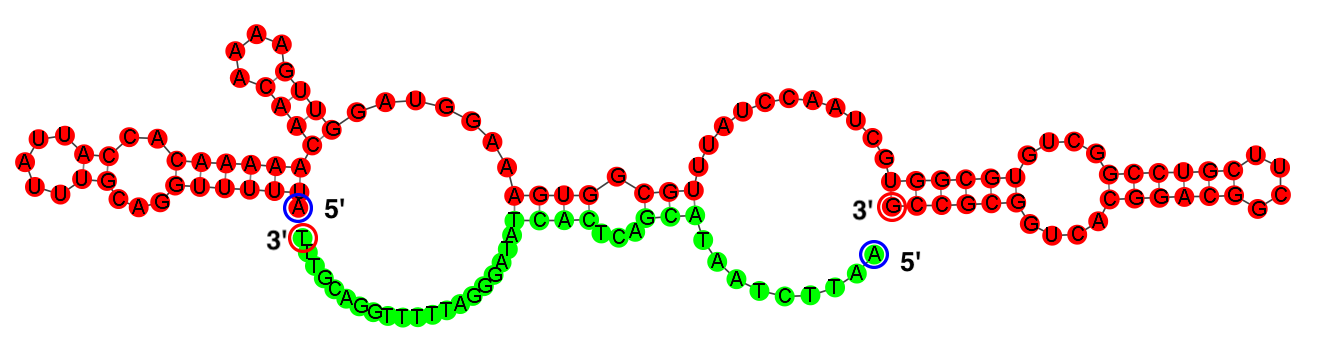 | |
|  |  | |
|  | **Corn** | |
| **PACRAT** | Works poorly | |
| RNA product | 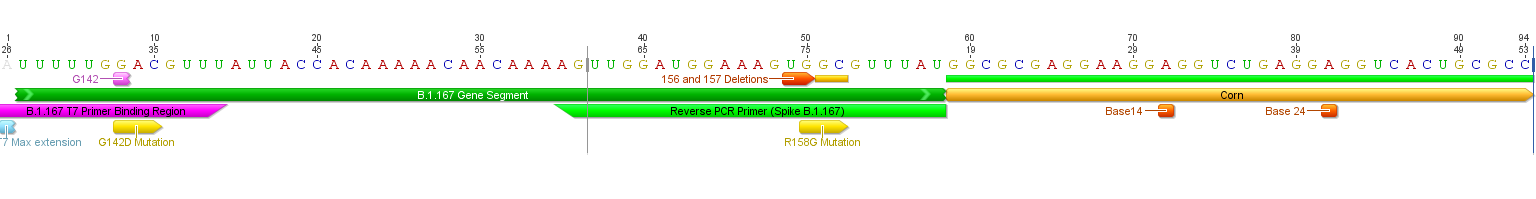   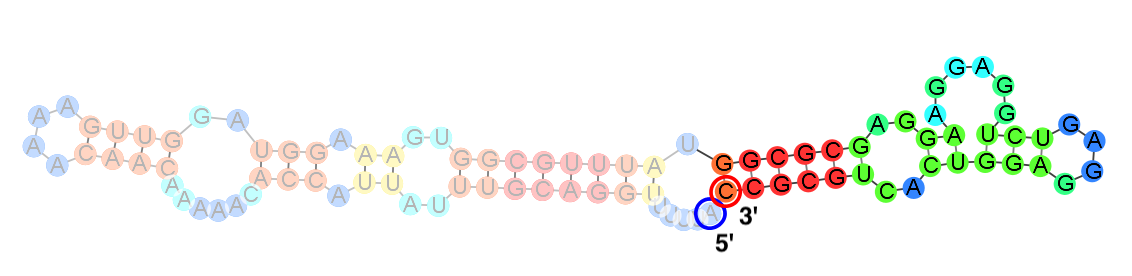 | |
| Interaction between aptamer primer and B.1.167 RNA | 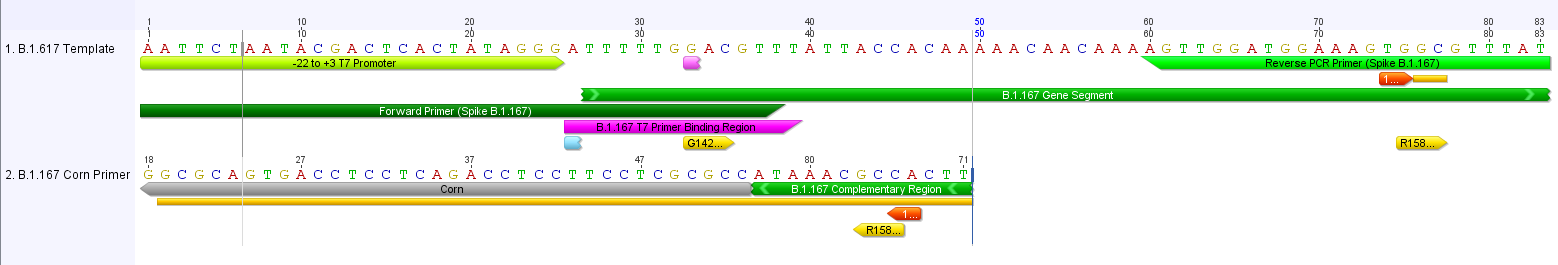  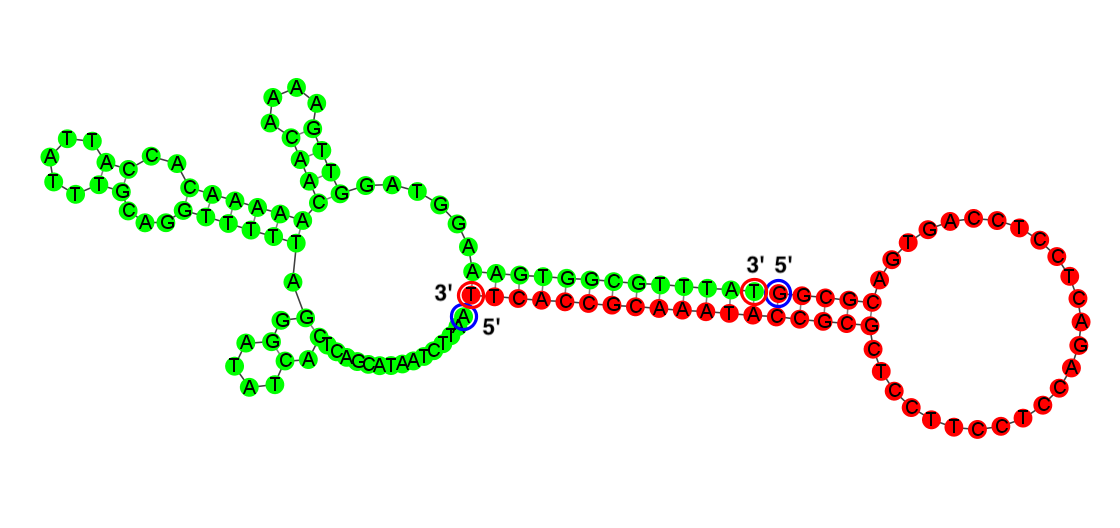 | |
| Interaction between T7 primer and B.1.167 RNA | 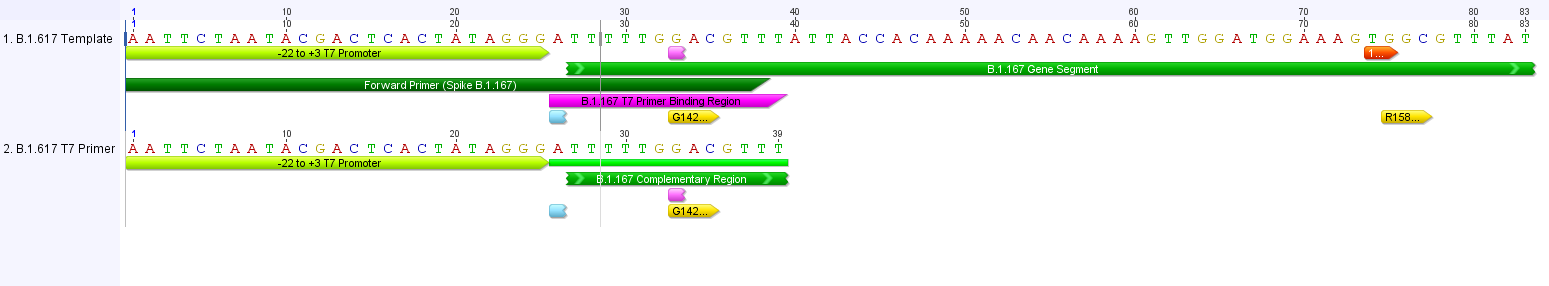  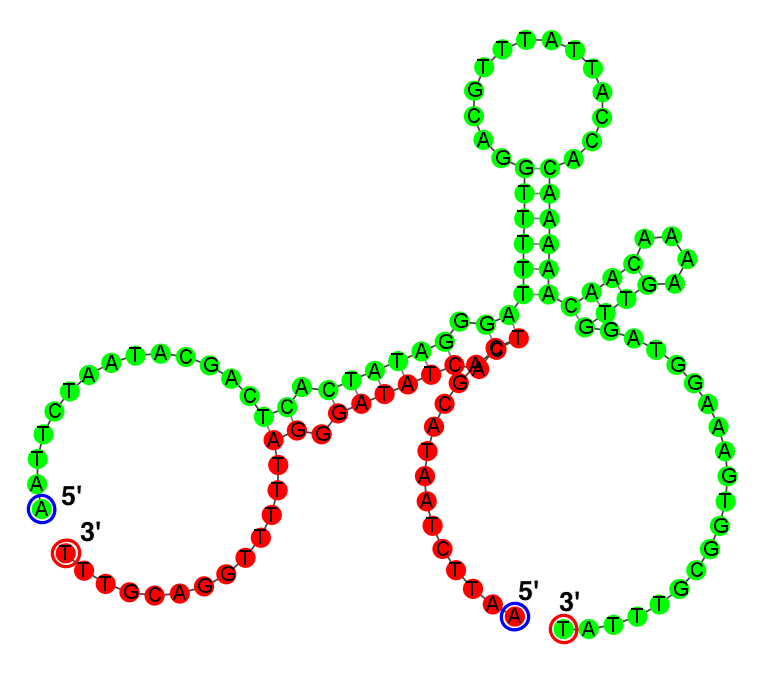 | |
| Interaction between aptamer primer and T7 primer | 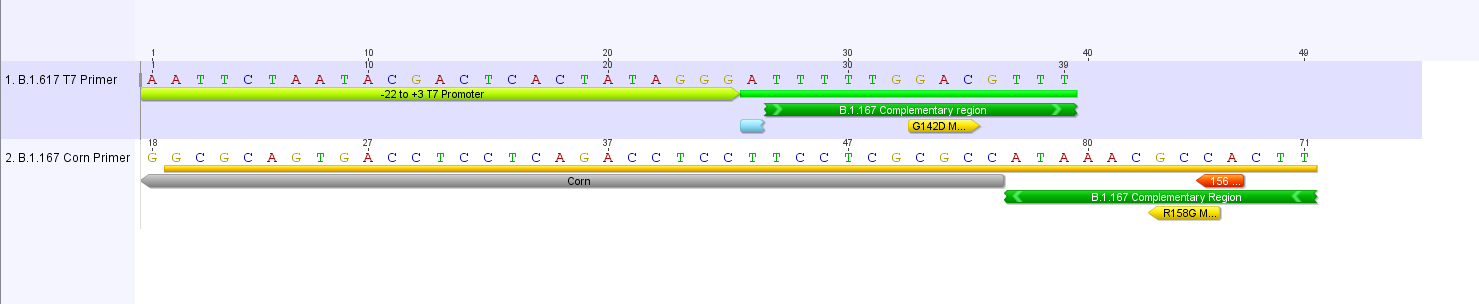  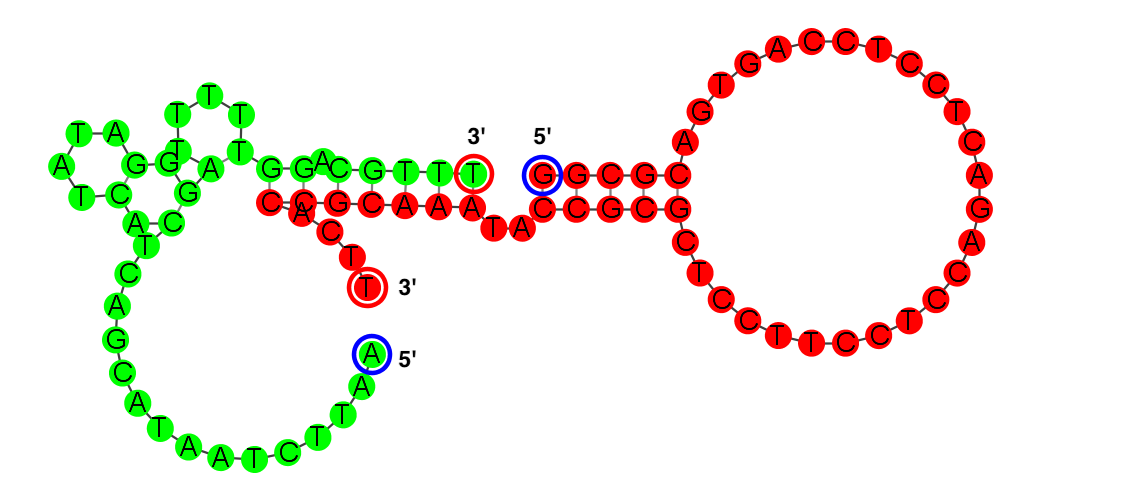 | |
|  |  | |
| Interaction between aptamer primer and RNA product | 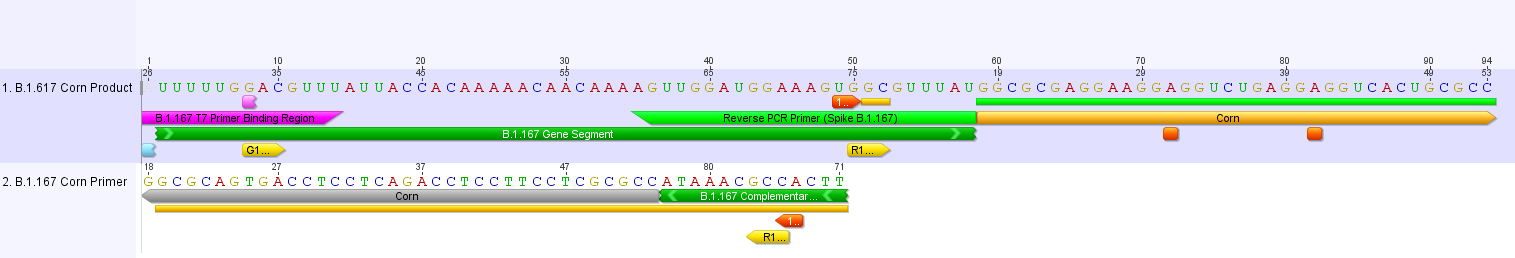  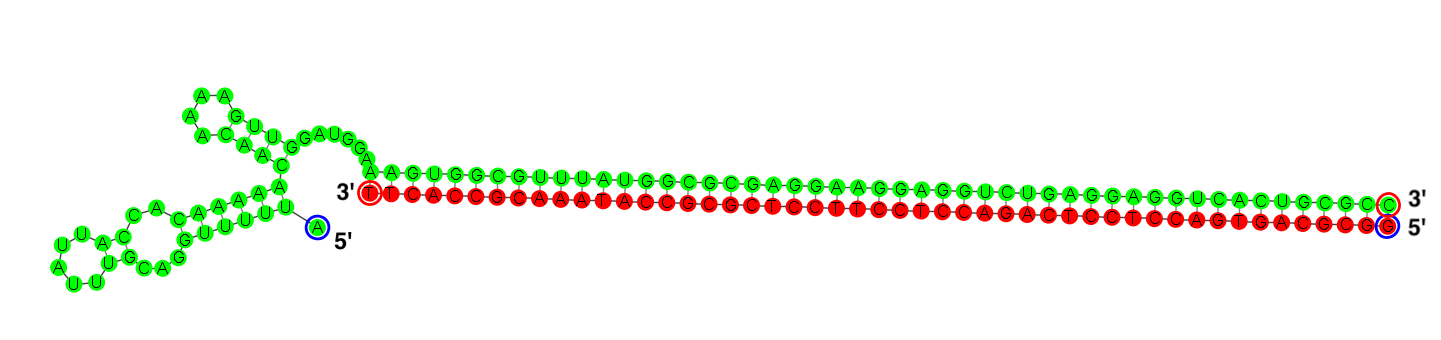 | |
| Interaction between T7 primer and product | 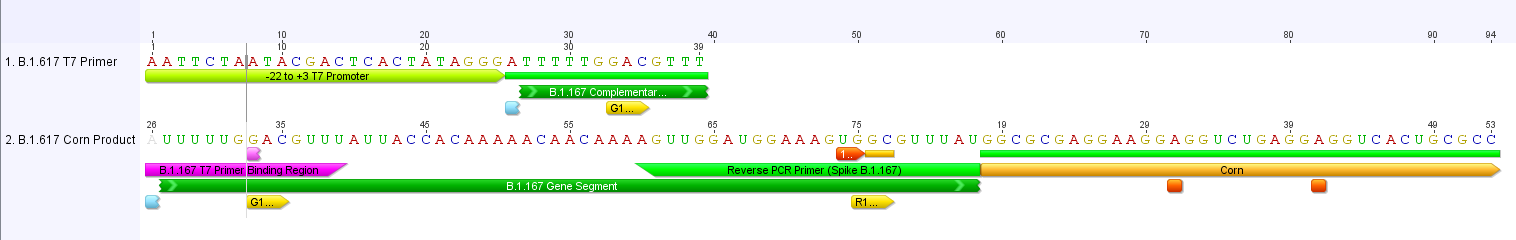  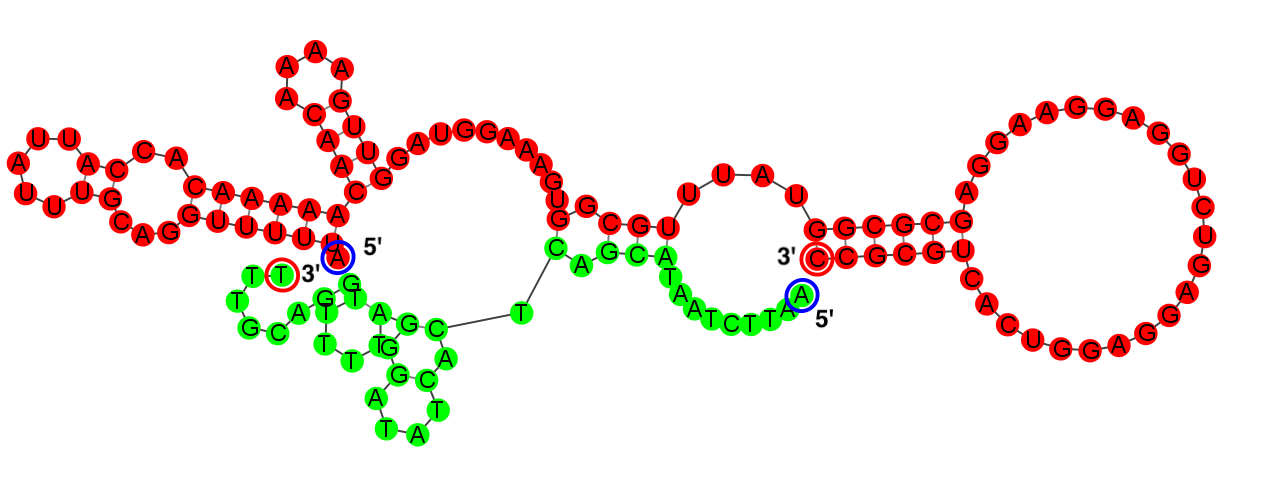 | |
|  |  | |
|  | **Broccoli** | |
| **PACRAT** | Does not work | |
| RNA product | 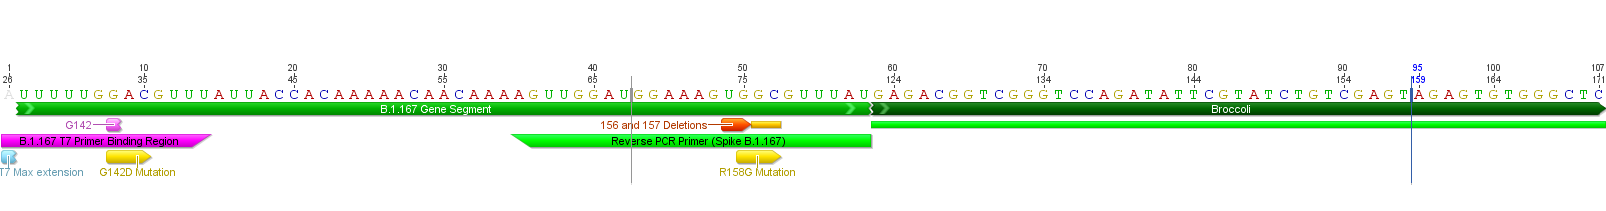   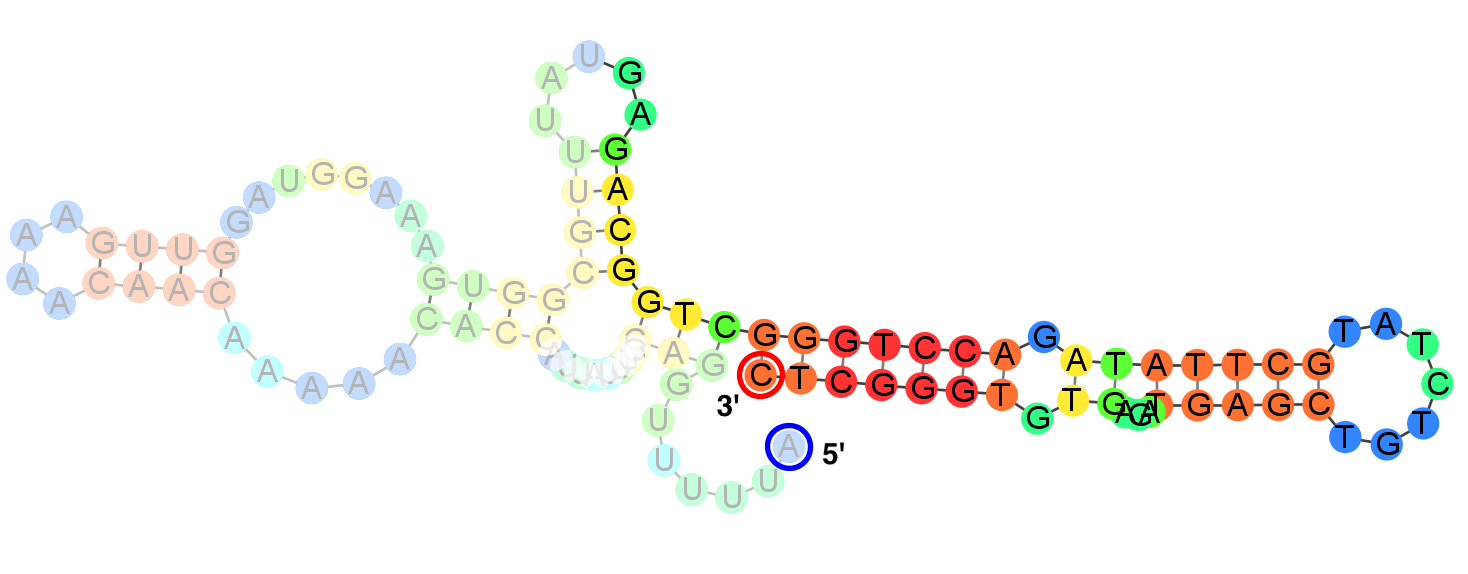 | |
| Interaction between aptamer primer and B.1.167 RNA | 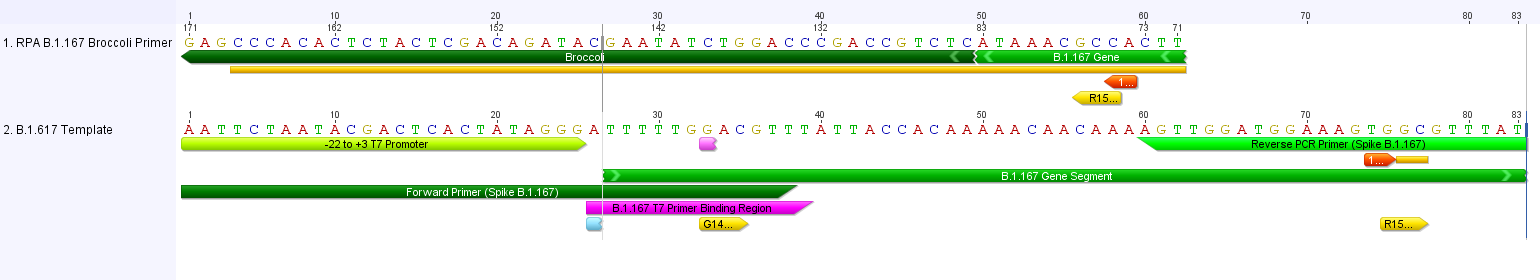  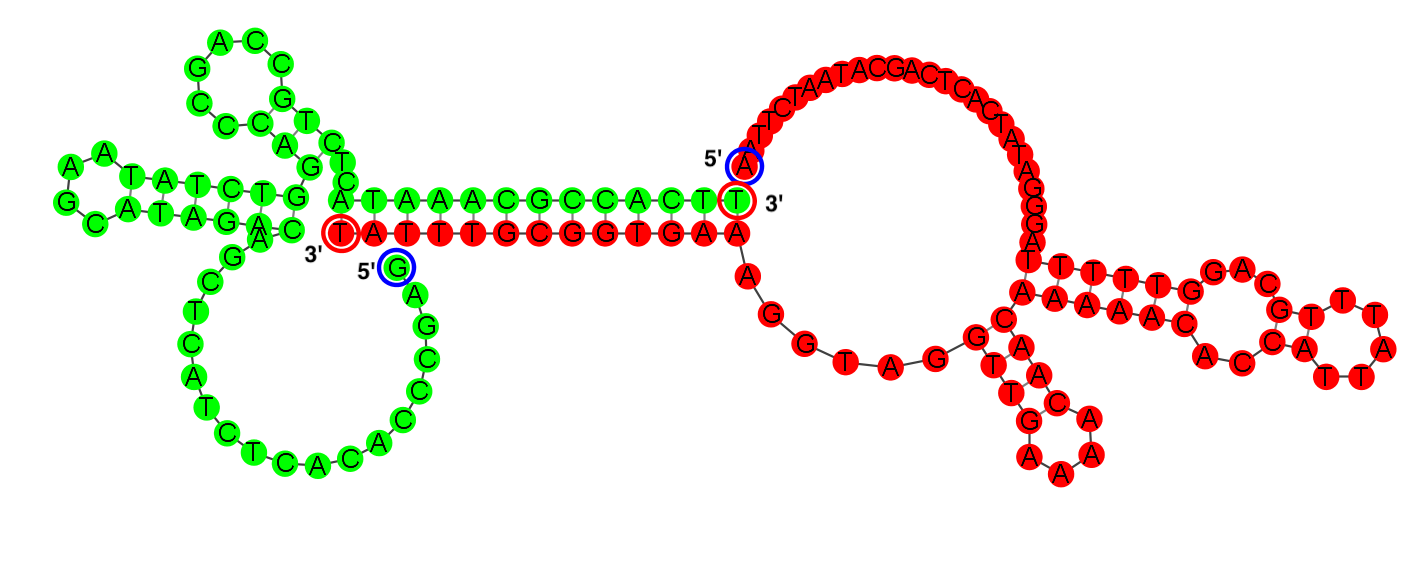 | |
| Interaction between T7 primer and B.1.167 RNA | 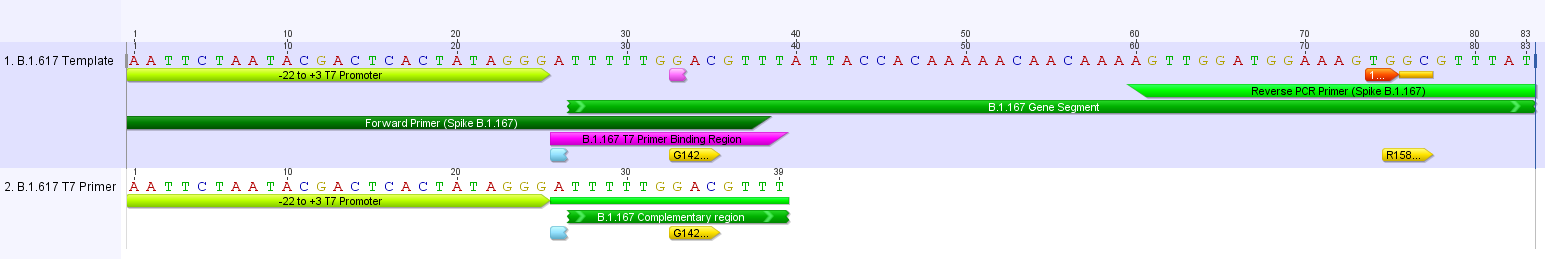  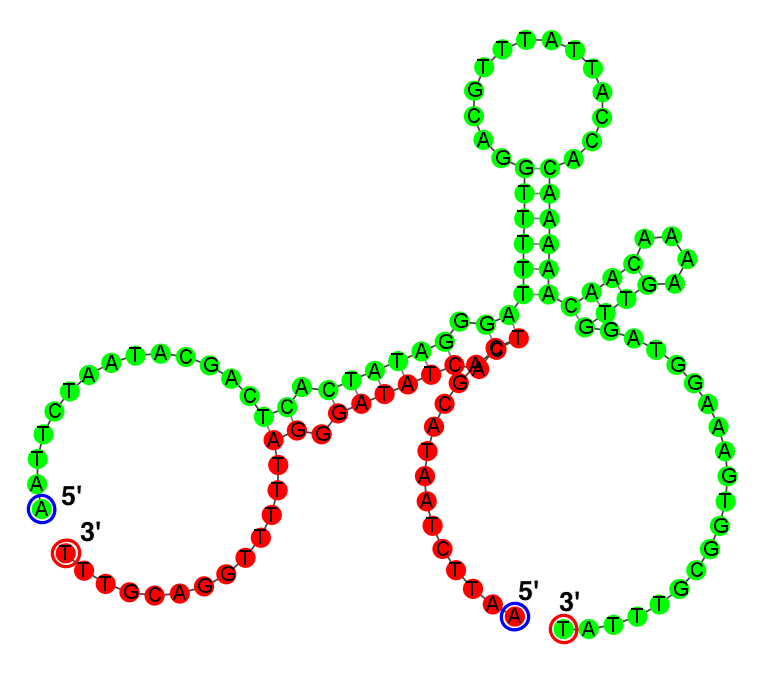 | |
| Interaction between aptamer primer and T7 primer | 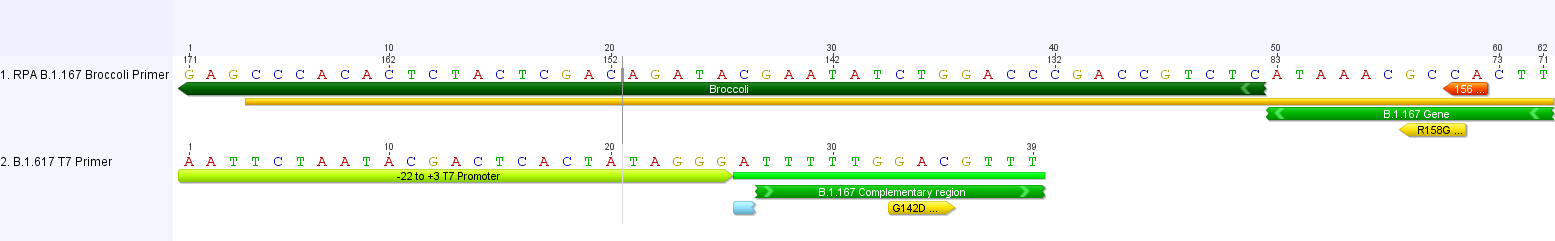  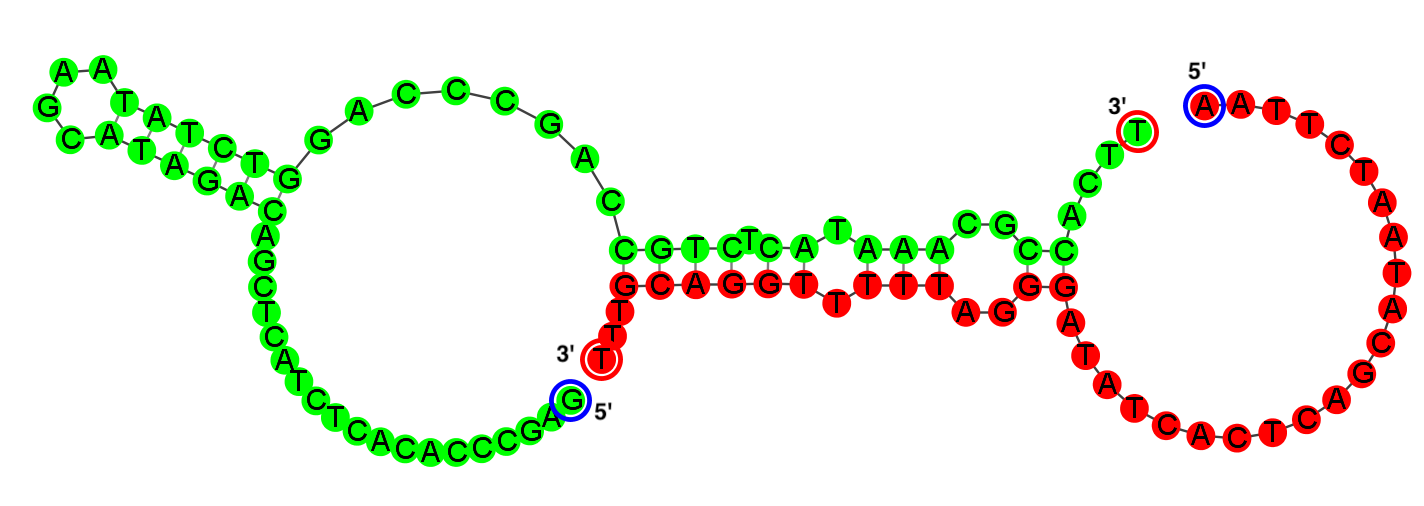 | |
|  |  | |
| Interaction between aptamer primer and RNA product | 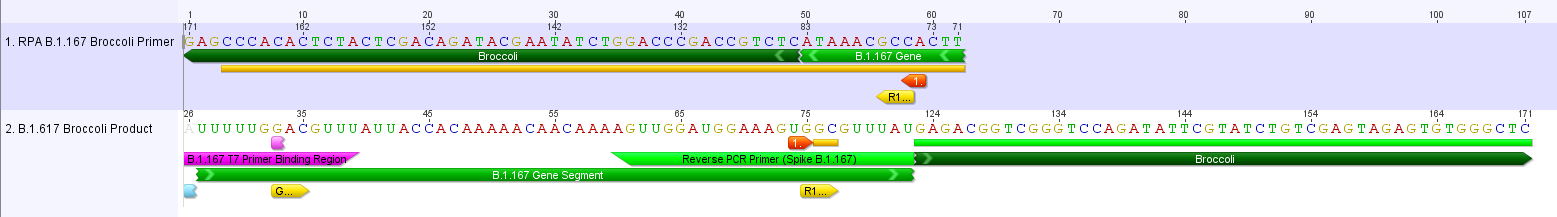  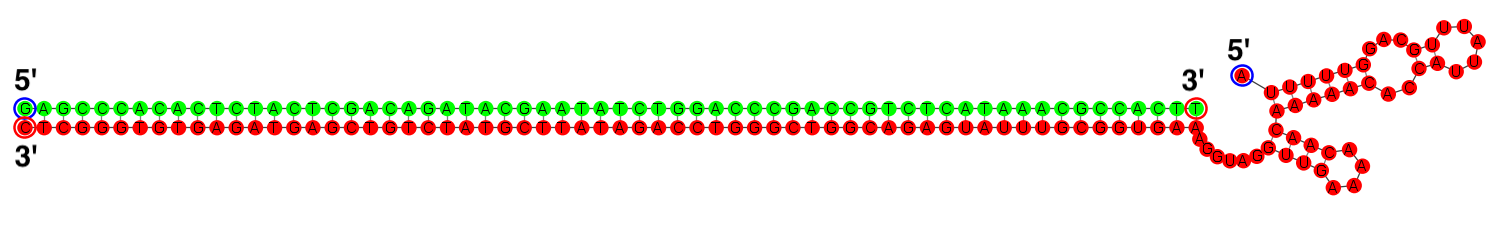 | |
| Interaction between T7 primer and product | 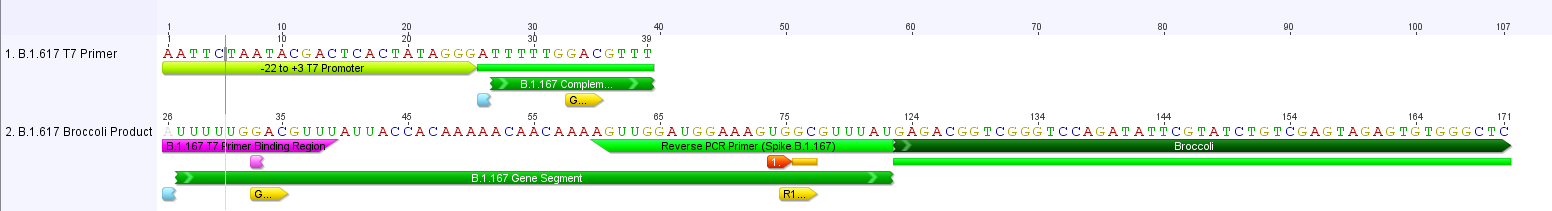  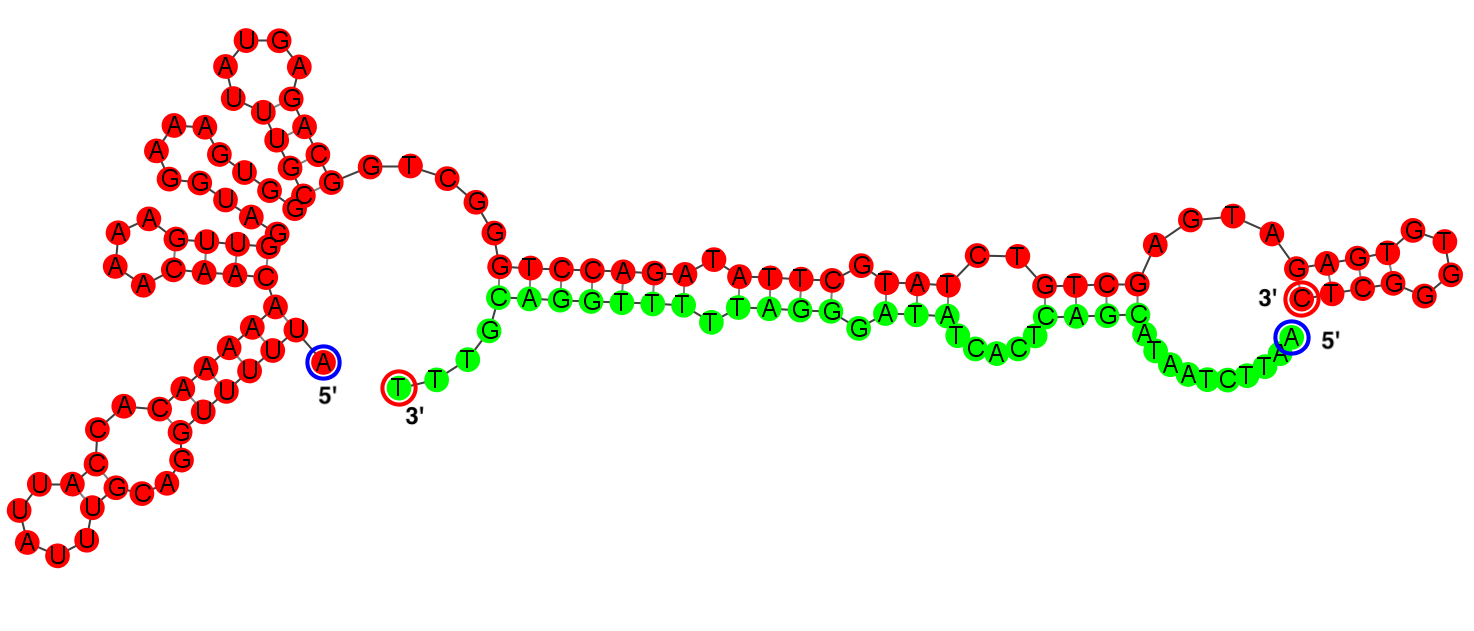 | |
|  |  | |
|  |  |

**Figure S7.** Scheme showing different folds predicted by Geneious bioinformatics software for PACRAT constructs employing different aptamers and SARS-CoV-2 B.1.167 RNA target. For PACRAT predicted products, bases are colored by base-pairing probabilities, where red: high, yellow/green: mid and blue: low probability. For interactions, sequence 1 is shown in green, while sequence 2 is shown in red. PACRAT real-time fluorescence results from these constructs are shown in **Figure S8.**

**
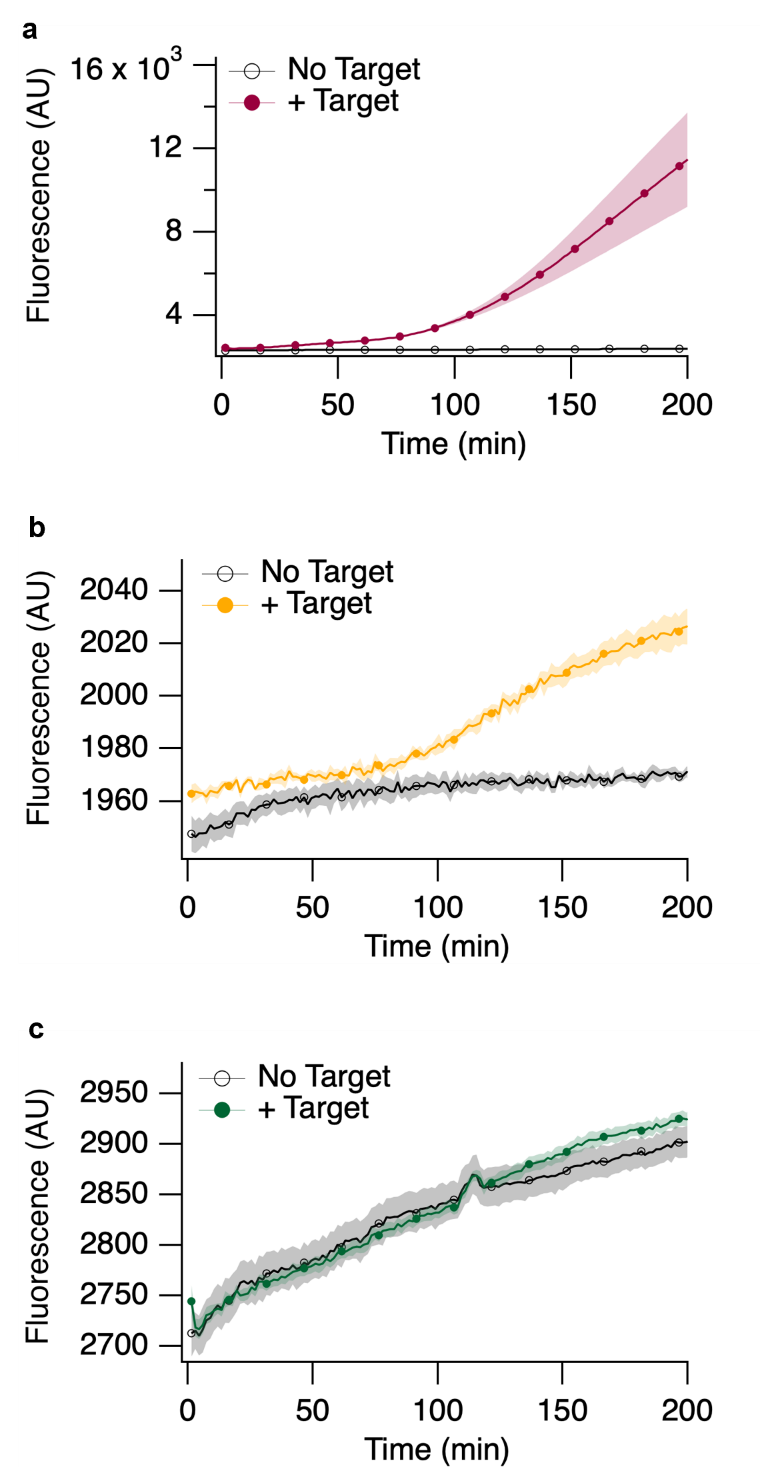
**

**Figure S8.** Real-time fluorescence curves from PACRAT reactions using different fluorescent aptamers (a) Pepper, (b) Corn, and (c) Broccoli with the same SARS-CoV-2 B.1.167 RNA target as shown in **Figure S7** folding predictions. Shaded area represents S.E.M. where n = 3.
